# Supplementary material for: Copper diaryl-dithiocarbamate complexes and their application as single source precursors (SSPs) for copper sulfide nanomaterials
Source: Royal Society of Chemistry journal article supplement (doi:10.1039/d3nj01918g), 2023-01-01
Supplement: d3nj01918g1.pdf [file d3nj01918g1.pdf]

## Copper diaryl-dithiocarbamate complexes and their application as single source precursors (SSPs) for copper-sulfide nanomaterials

### Electronic Supplementary Information (ESI)

**Table S1.** Crystallographic data and structural refinement details

**Table S2.** Particle size of copper sulfides as calculated using the Scherrer equation

**Table S3.** TGA and DSC results for dry  $[\text{Cu}\{\text{S}_2\text{CN}(\text{p-tolyl})_2\}_2]$  (**2b**) heating rate 10 °C/min.

**Fig. S1** CVs of **2b** (1 mM) in 0.1 M  $[\text{Bu}_4\text{N}][\text{PF}_6]$  in  $\text{CH}_2\text{Cl}_2$  at -78 °C at a scan rates of 0.02-0.5  $\text{V}\text{s}^{-1}$

**Fig. S2**  $^1\text{H}$  NMR (in  $\text{CDCl}_3$ ) of  $[\text{Cu}\{\text{S}_2\text{CN}(\text{p-tolyl})_2\}]$  (**3**)

**Fig. S3**  $^{13}\text{C}\{^1\text{H}\}$  NMR (in  $\text{CDCl}_3$ ) of  $[\text{Cu}\{\text{S}_2\text{CN}(\text{p-tolyl})_2\}]$  (**3**)

**Fig.S4.**  $^1\text{H}$  NMR (in  $\text{dms}\text{-d}^6$ ) of  $[\text{Cu}\{\text{S}_2\text{CN}(\text{p-tolyl})_2\}]$  (**3**)

**Fig. S5**  $^{13}\text{C}\{^1\text{H}\}$  NMR (in  $\text{dms}\text{-d}^6$ ) of  $[\text{Cu}\{\text{S}_2\text{CN}(\text{p-tolyl})_2\}]$  (**3**)

**Fig. S6**  $^1\text{H}$  NMR (in  $\text{CDCl}_3$ ) of  $[\text{Cu}\{\text{S}_2\text{CN}(\text{p-tolyl})_2\}(\text{PPh}_3)_2]$  (**4**)

**Fig. S7**  $^{13}\text{C}\{^1\text{H}\}$  NMR (in  $\text{CDCl}_3$ ) of  $[\text{Cu}\{\text{S}_2\text{CN}(\text{p-tolyl})_2\}(\text{PPh}_3)_2]$  (**4**)

**Fig. S8**  $^{31}\text{P}\{^1\text{H}\}$  NMR (in  $\text{CDCl}_3$ ) of  $[\text{Cu}\{\text{S}_2\text{CN}(\text{p-tolyl})_2\}(\text{PPh}_3)_2]$  (**4**)

**Fig. S9** SAED pattern of  $\text{Cu}_{1.84}\text{S}$  nanoparticles produced from **2b** by HU

**Fig. S10** SEM of nanomaterials formed from dry decomposition of **2b**

**Fig. S11** PXRD pattern of nanomaterials formed from dry decomposition of **2b** compared to those from HU and HI

**Fig. S12** EDX map of  $\text{Cu}_{1.94}\text{S}$  (worm-like morphology) produced from **2b** by dry decomposition

**Table S1.** Crystallographic data and structural refinement details

| Complex                                             | <b>2b</b>                                                           | <b>2c</b>                                                                      | <b>4</b>                                                            |
|-----------------------------------------------------|---------------------------------------------------------------------|--------------------------------------------------------------------------------|---------------------------------------------------------------------|
| Empirical formula                                   | C <sub>30</sub> H <sub>28</sub> N <sub>2</sub> S <sub>4</sub> Cu    | C <sub>30</sub> H <sub>28</sub> CuN <sub>2</sub> O <sub>4</sub> S <sub>4</sub> | C <sub>51</sub> H <sub>44</sub> CuNP <sub>2</sub> S <sub>2</sub>    |
| Formula weight (Å)                                  | 608.32                                                              | 672.32                                                                         | 860.47                                                              |
| Temperature (K)                                     | 100(1)                                                              | 150(2)                                                                         | 100(2)                                                              |
| Crystal system                                      | monoclinic                                                          | monoclinic                                                                     | monoclinic                                                          |
| Space group                                         | P2 <sub>1</sub> /c                                                  | P2 <sub>1</sub> /n                                                             | P2 <sub>1</sub> /c                                                  |
| Unit cell dimensions                                |                                                                     |                                                                                |                                                                     |
| <i>a</i> (Å)                                        | 11.1900(6)                                                          | 9.7567(2)                                                                      | 18.9452(4)                                                          |
| <i>b</i> (Å)                                        | 17.2006(6)                                                          | 19.5651(2)                                                                     | 12.0938(2)                                                          |
| <i>c</i> (Å)                                        | 14.9006(5)                                                          | 16.5460(2)                                                                     | 19.1076(5)                                                          |
| $\alpha$ (°)                                        | 90                                                                  | 90                                                                             | 90                                                                  |
| $\beta$ (°)                                         | 97.231(4)                                                           | 99.443(1)                                                                      | 105.406(3)                                                          |
| $\gamma$ (°)                                        | 90                                                                  | 90                                                                             | 90                                                                  |
| Volume (Å <sup>3</sup> )                            | 2845.2(2)                                                           | 3115.68(8)                                                                     | 4220.61(17)                                                         |
| Z                                                   | 4                                                                   | 4                                                                              | 4                                                                   |
| Density (calculated) (g/cm <sup>3</sup> )           | 1.420                                                               | 1.433                                                                          | 1.354                                                               |
| Absorption coefficient                              | 3.994                                                               | 3.804                                                                          | 0.730                                                               |
| F(000)                                              | 1260                                                                | 1388                                                                           | 1792                                                                |
| Crystal size (mm)                                   | 0.07 × 0.05 × 0.01                                                  | 0.28 × 0.04 × 0.03                                                             | 0.38 × 0.025 × 0.02                                                 |
| $\theta$ Range for data collection (°)              | 7.886 to 140.898                                                    | 7.052 to 145.842                                                               | 4.04 to 57.436                                                      |
| Index ranges                                        | -13 ≤ <i>h</i> ≤ 12,<br>-20 ≤ <i>k</i> ≤ 20,<br>-17 ≤ <i>l</i> ≤ 17 | -11 ≤ <i>h</i> ≤ 11<br>-23 ≤ <i>k</i> ≤ 24<br>-20 ≤ <i>l</i> ≤ 20              | -25 ≤ <i>h</i> ≤ 25<br>-15 ≤ <i>k</i> ≤ 15<br>-25 ≤ <i>l</i> ≤ 25   |
| Reflections collected                               | 21888                                                               | 51710                                                                          | 51312                                                               |
| Independent reflections                             | 5239                                                                | 6144                                                                           | 9554                                                                |
| Data / restraints / parameters                      | 5239/0/338                                                          | 6144/0/482                                                                     | 9554/0/516                                                          |
| Goodness-of-fit on <i>F</i> <sup>2</sup>            | 1.040                                                               | 1.076                                                                          | 1.026                                                               |
| Final <i>R</i> indices [ <i>I</i> > 2σ( <i>I</i> )] | <i>R</i> <sub>1</sub> = 0.0667,<br>w <i>R</i> <sub>2</sub> = 0.1516 | <i>R</i> <sub>1</sub> = 0.0300,<br>w <i>R</i> <sub>2</sub> = 0.0761            | <i>R</i> <sub>1</sub> = 0.0834,<br>w <i>R</i> <sub>2</sub> = 0.1866 |
| <i>R</i> indices (all data)                         | <i>R</i> <sub>1</sub> = 0.0999,<br>w <i>R</i> <sub>2</sub> = 0.1694 | <i>R</i> <sub>1</sub> = 0.0338,<br>w <i>R</i> <sub>2</sub> = 0.0786            | <i>R</i> <sub>1</sub> = 0.1369,<br>w <i>R</i> <sub>2</sub> = 0.2143 |
| Largest peak and hole(e.Å <sup>-3</sup> )           | 0.72/-0.59                                                          | 0.47/-0.37                                                                     | 1.40/-0.78                                                          |

**Table S2.** Particle size of copper sulfides as calculated using the Scherrer equation

| SSP       | Conditions      | Phases               | Crystallite size (nm) |
|-----------|-----------------|----------------------|-----------------------|
| <b>2b</b> | OLA, 140 °C, HU | CuS                  | 24                    |
| <b>2b</b> | OLA, 230 °C, HU | Cu <sub>1.84</sub> S | 36                    |
| <b>2b</b> | OLA, 230 °C, HI | Cu <sub>1.84</sub> S | 35                    |
| <b>3</b>  | OLA, 230 °C, HU | Cu <sub>1.84</sub> S | 60                    |
| <b>3</b>  | OLA, 230 °C, HI | Cu <sub>1.84</sub> S | 50                    |

Particle size of copper sulfides calculated by Scherrer equation,  $D = \frac{K\gamma}{\beta \cos\theta}$

(Where, D = Crystallite size, Scherrer constant  $K = 0.9$ , Wavelength of the X-ray source,  $\gamma = 0.15406$  nm,  $\beta$  = FWHM,  $2\theta$  = peak position)

**Table S3.** TGA and DSC results for dry  $[\text{Cu}\{\text{S}_2\text{CN}(\text{p-tolyl})_2\}_2]$  (**2b**) heating rate  $10$  °C/min.

| Solvent     | TGA                         |                                                     | DSC<br>T °C | TGA weight<br>loss (%) |
|-------------|-----------------------------|-----------------------------------------------------|-------------|------------------------|
|             | Decomposition steps<br>T °C | Decomposition<br>Temperature<br>(Middle point) T °C |             |                        |
| Solventless | 55.6-247.7                  | 205.2                                               | 100         | 3.6                    |
|             | 249.8-297.4                 | 266.5                                               | 270         | 56.6                   |
|             | 300.5-594.1                 | 351.9                                               |             | 14.8                   |

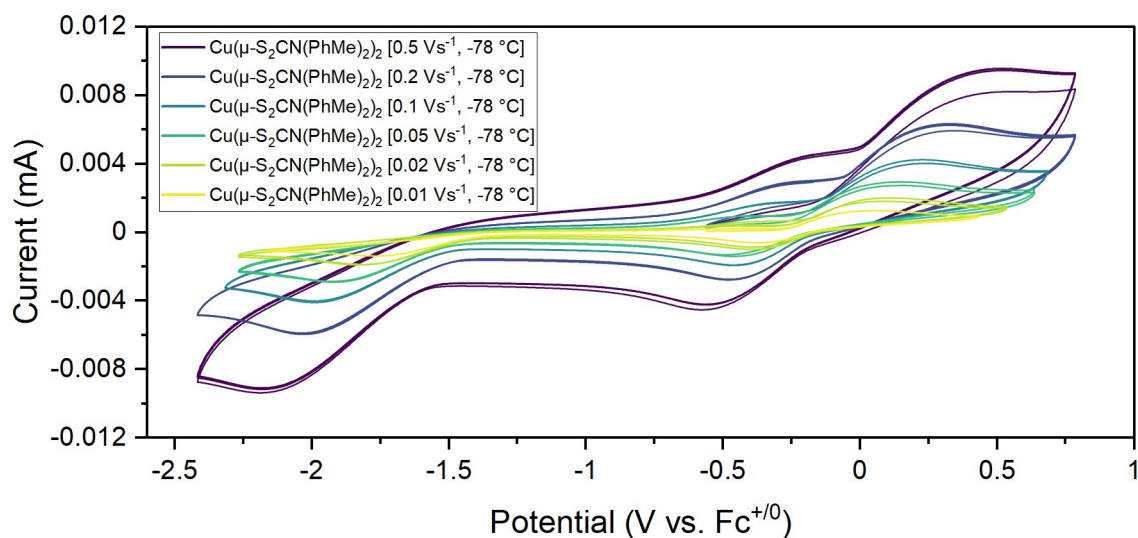

**Fig. S1** CVs of **2b** (1 mM) in 0.1 M  $[\text{Bu}_4\text{N}][\text{PF}_6]$  in  $\text{CH}_2\text{Cl}_2$  at  $-78$  °C at a scan rates of  $0.02$ - $0.5$   $\text{Vs}^{-1}$

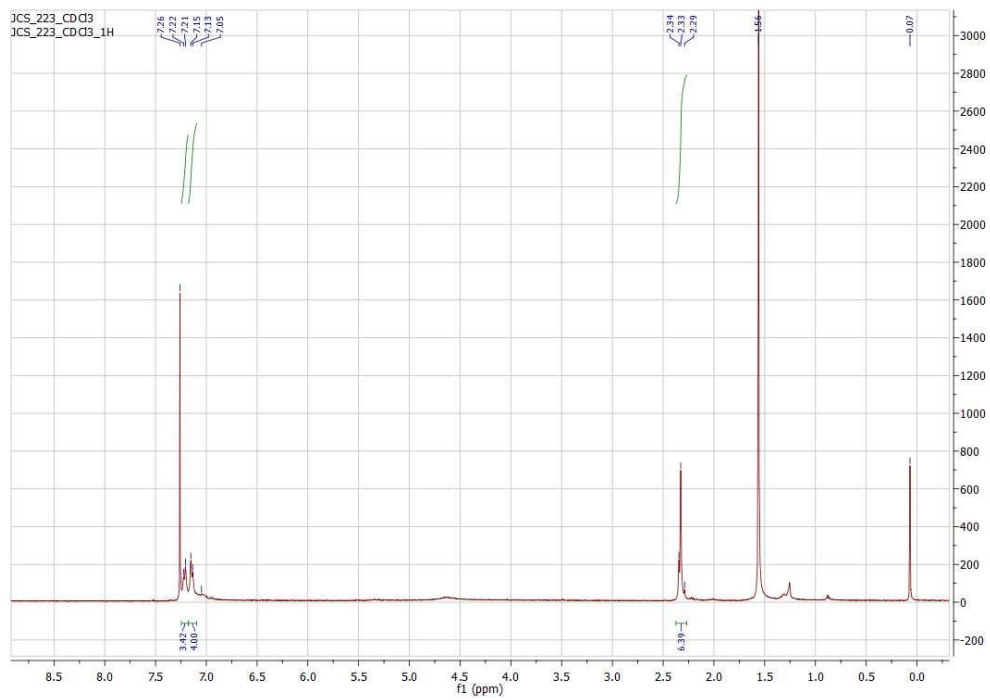

**Fig. S2** <sup>1</sup>H NMR (in CDCl<sub>3</sub>) of [Cu{S<sub>2</sub>CN(p-tolyl)<sub>2</sub>}] (**3**)

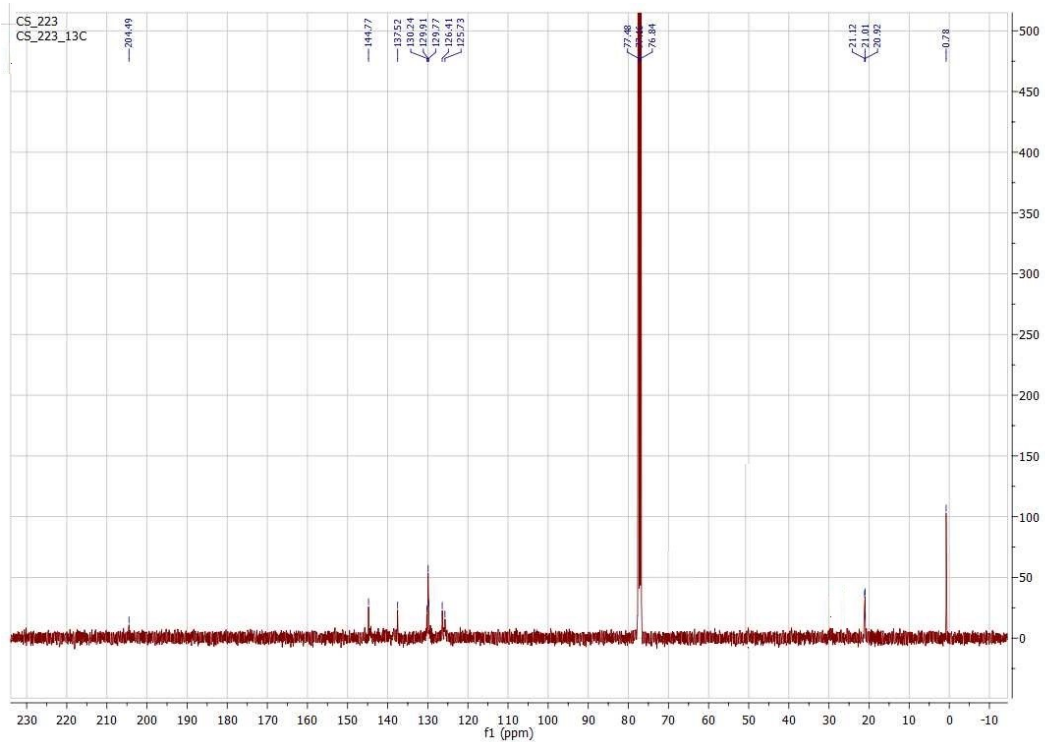

**Fig. S3** <sup>13</sup>C{<sup>1</sup>H} NMR (in CDCl<sub>3</sub>) of [Cu{S<sub>2</sub>CN(p-tolyl)<sub>2</sub>}] (**3**)

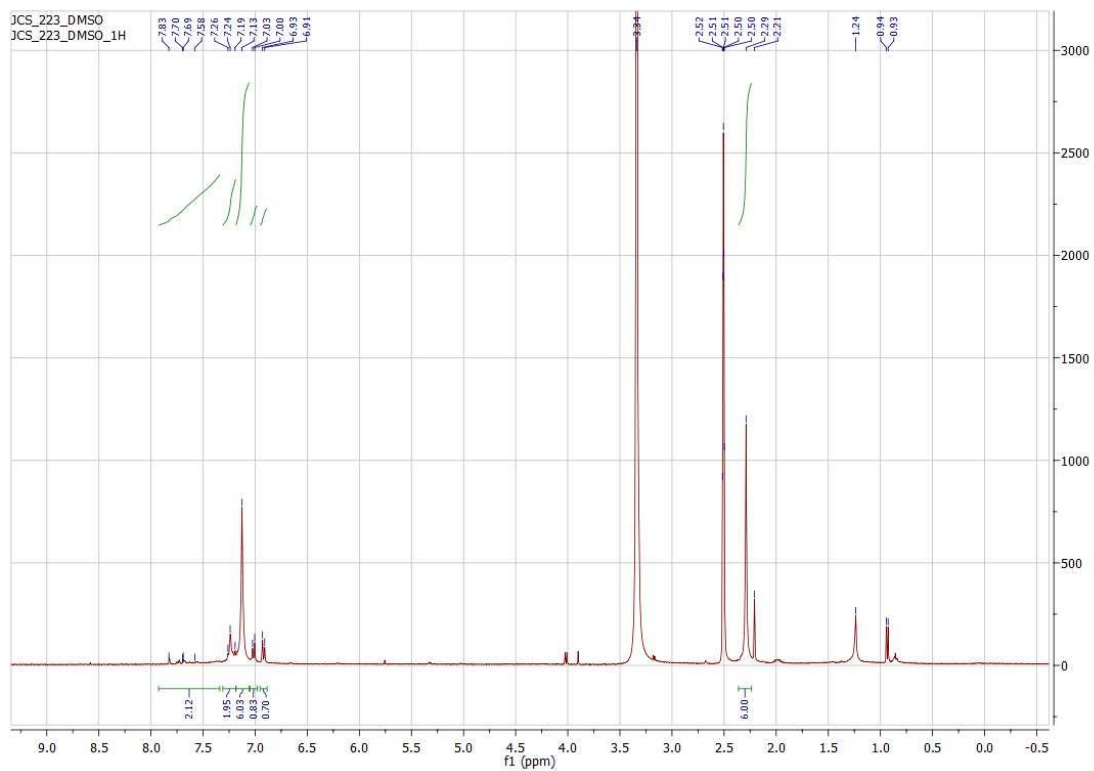

**Fig.S4.**  $^1\text{H}$  NMR (in  $\text{dms0-d}^6$ ) of  $[\text{Cu}\{\text{S}_2\text{CN}(\text{p-tolyl})_2\}]$  (**3**)

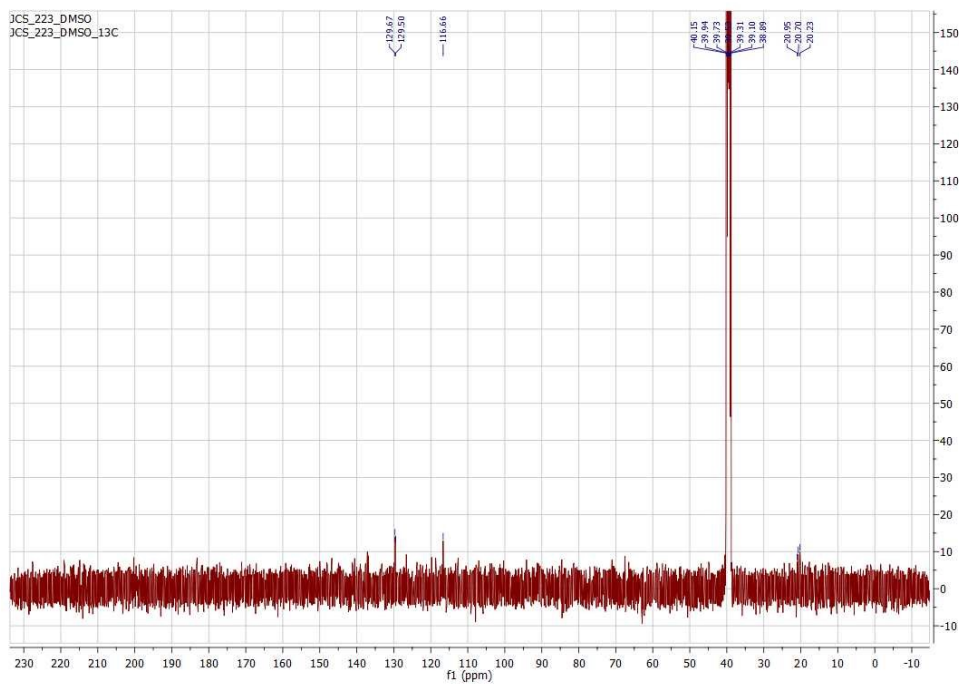

**Fig. S5**  $^{13}\text{C}\{^1\text{H}\}$  NMR (in  $\text{dms0-d}^6$ ) of  $[\text{Cu}\{\text{S}_2\text{CN}(\text{p-tolyl})_2\}]$  (**3**)

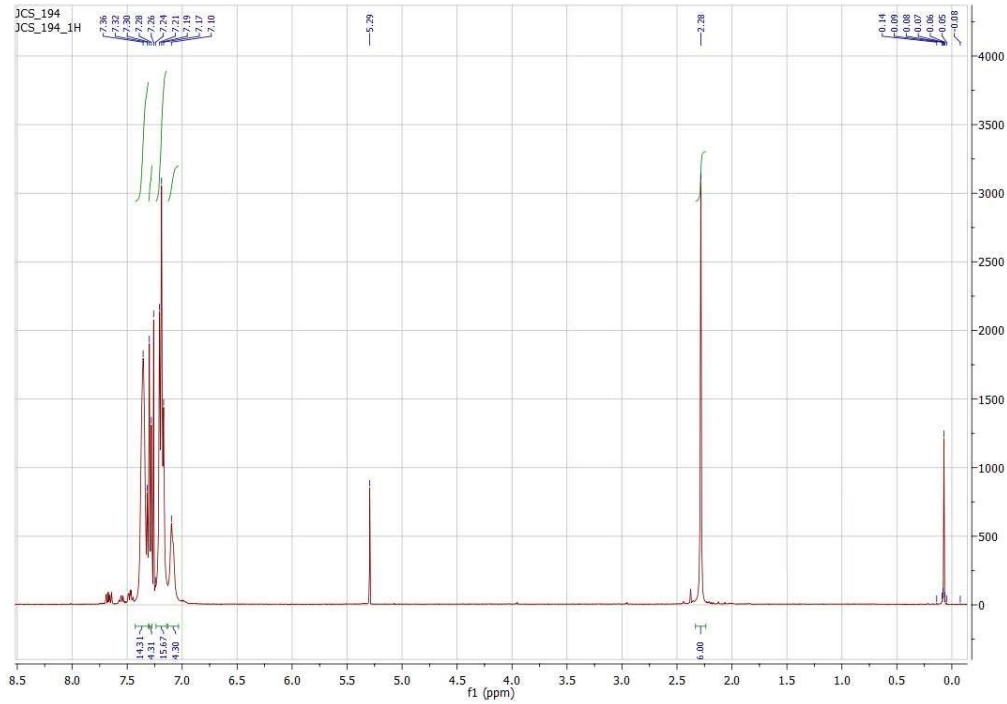

Fig. S6  $^1\text{H}$  NMR (in  $\text{CDCl}_3$ ) of  $[\text{Cu}\{\text{S}_2\text{CN}(\text{p-tolyl})_2\}(\text{PPh}_3)_2]$  (**4**)

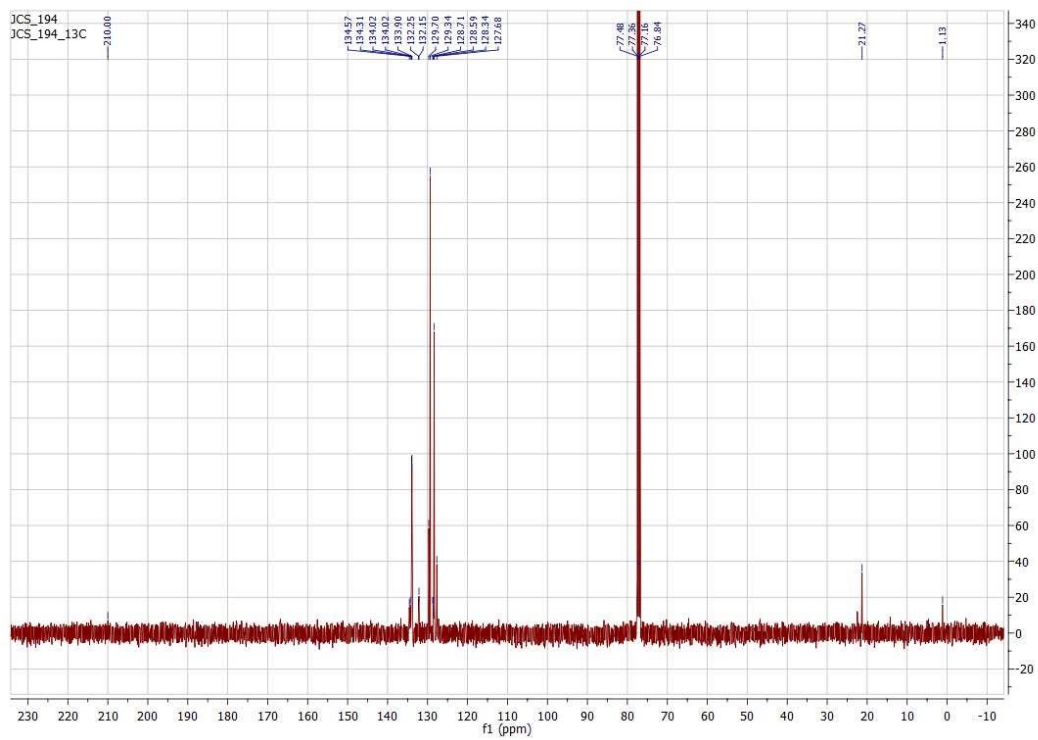

Fig. S7  $^{13}\text{C}\{^1\text{H}\}$  NMR (in  $\text{CDCl}_3$ ) of  $[\text{Cu}\{\text{S}_2\text{CN}(\text{p-tolyl})_2\}(\text{PPh}_3)_2]$  (**4**)

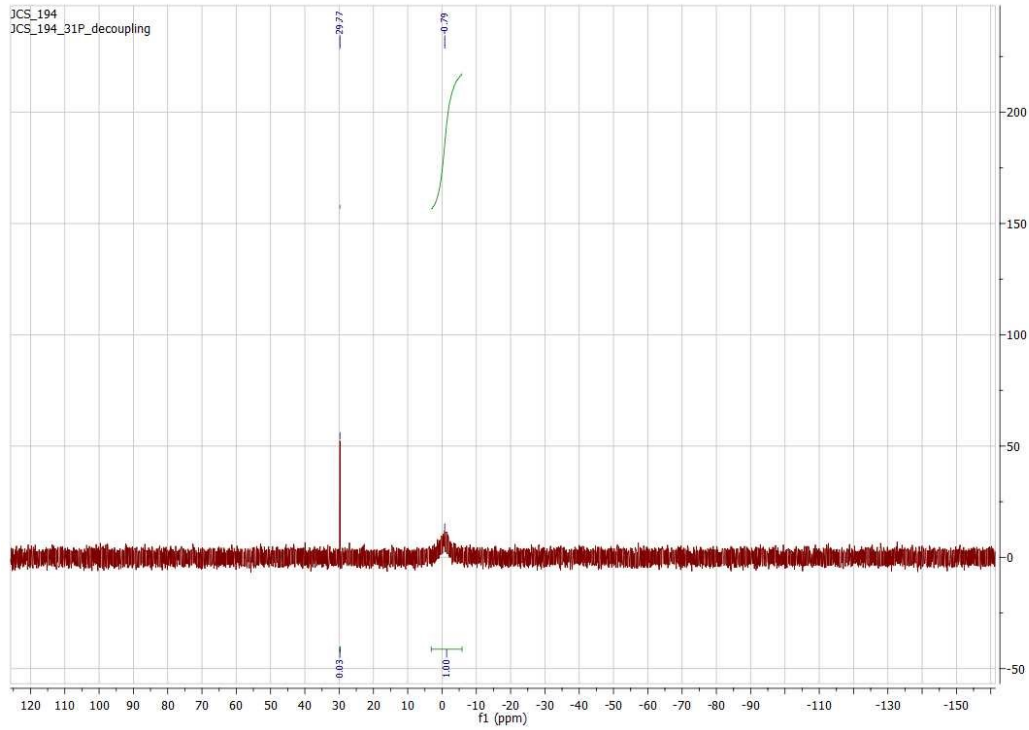

**Fig. S8**  $^{31}\text{P}\{^1\text{H}\}$  NMR (in  $\text{CDCl}_3$ ) of  $[\text{Cu}\{\text{S}_2\text{CN}(\text{p-tolyl})_2\}(\text{PPh}_3)_2]$  (**4**)

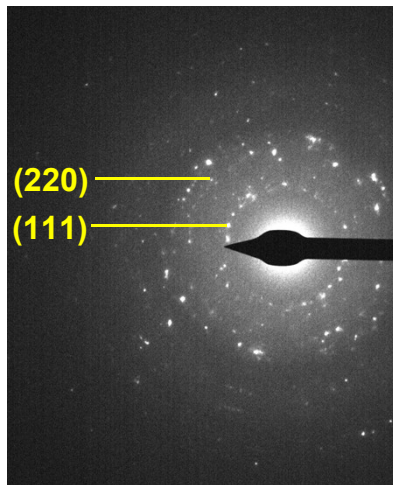

**Fig. S9** SAED pattern of  $\text{Cu}_{1.84}\text{S}$  nanoparticles produced from **2b** by HU

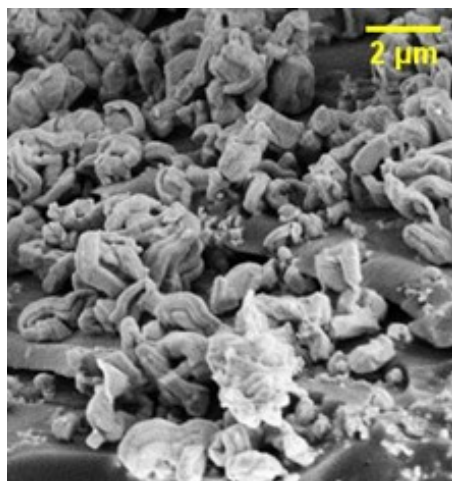

**Fig. S10** SEM of nanomaterials formed from dry decomposition of **2b**

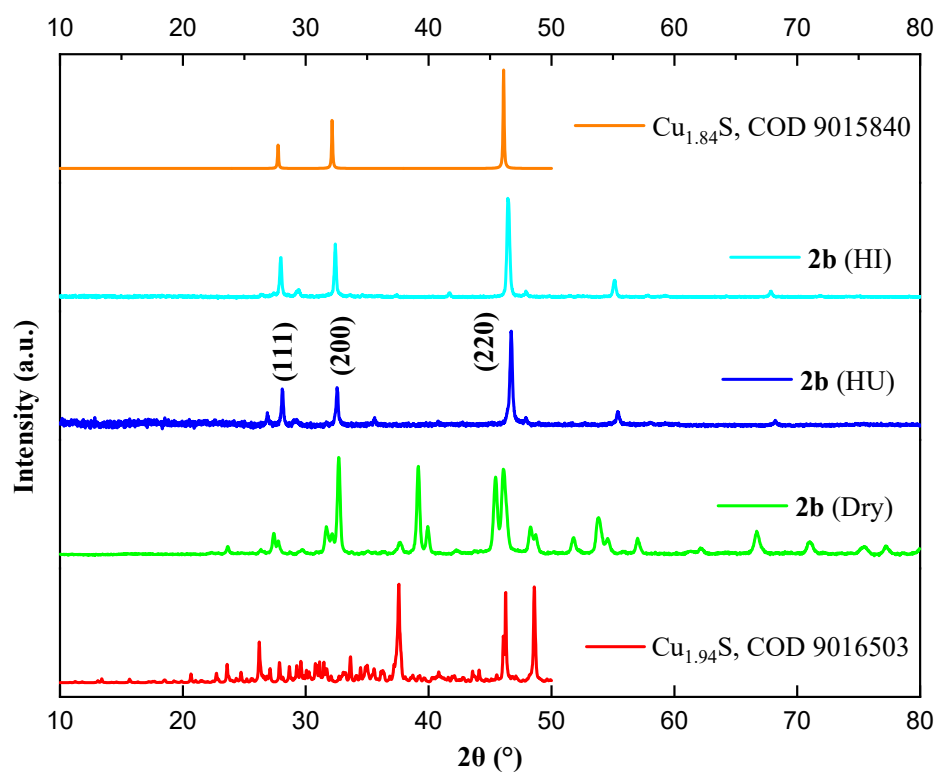

**Fig. S11** PXRD pattern of nanomaterials formed from dry decomposition of **2b** compared to those from HU and HI



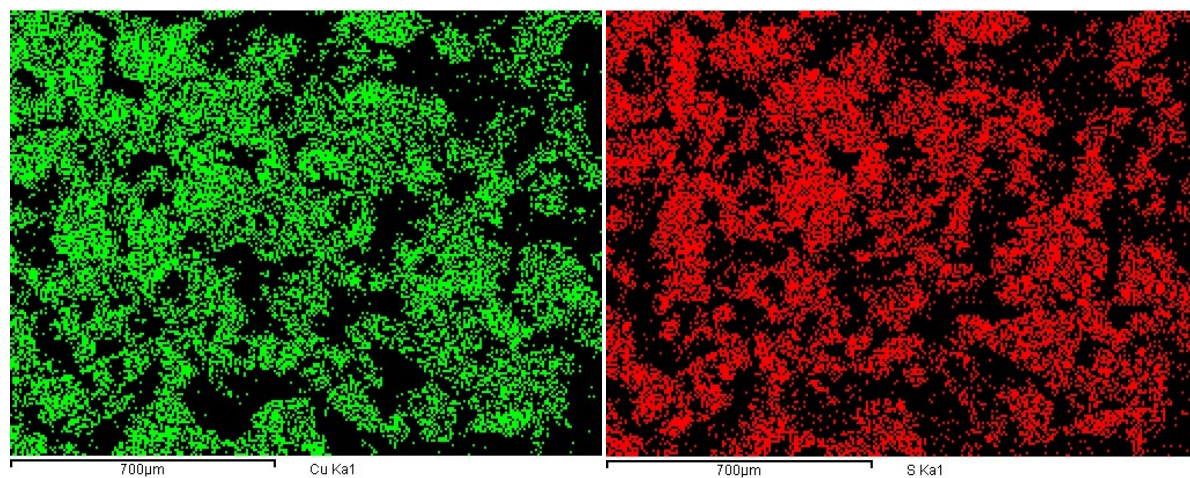

**Fig. S12** EDX map of  $\text{Cu}_{1.94}\text{S}$  (worm-like morphology) produced from **2b** by dry decomposition

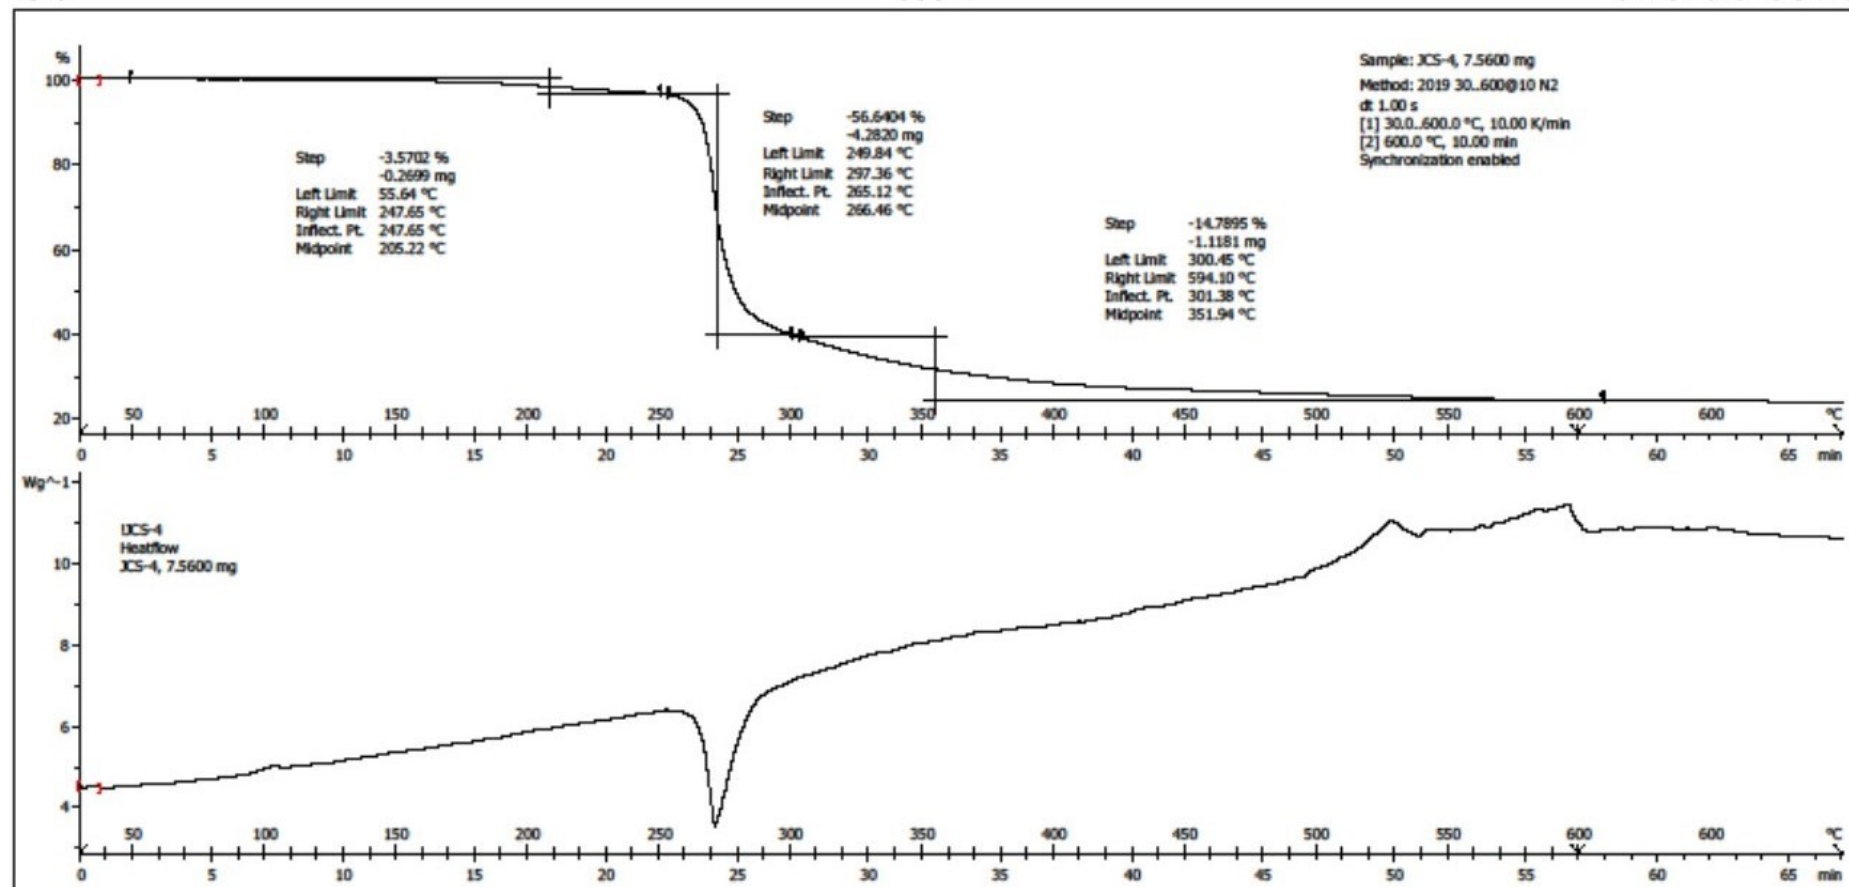

School of Chemistry Microanalysis Lab: METTLER

STAR® SW 10.00

Fig. S13 TGA profile of  $[\text{Cu}\{\text{S}_2\text{CN}(\text{p-tolyl})_2\}_2]$  (2b)
